# Supplementary material for: Ultra-smooth glassy graphene thin films for flexible transparent circuits
Source: PubMed Central journal article supplement — Sci Adv. 2016 Nov 30;2(11):e1601574. doi: 10.1126/sciadv.1601574 (PMC5262465; doi:10.1126/sciadv.1601574), 2016-11-30
Supplement: 1601574_SM.pdf [file 1601574_SM.pdf]

## Supplementary Materials for

### **Ultra-smooth glassy graphene thin films for flexible transparent circuits**

Xiao Dai, Jiang Wu, Zhicheng Qian, Haiyan Wang, Jie Jian, Yingjie Cao, Mark H. Rummeli, Qinghua Yi, Huiyun Liu, Guifu Zou

Published 30 November 2016, *Sci. Adv.* **2**, e1601574 (2016)

DOI: 10.1126/sciadv.1601574

#### **This PDF file includes:**

- fig. S1. HRTEM images of glassy graphene.
- fig. S2. Resistance and conductivity of glassy graphene thin films after transfer.
- fig. S3. Structure and property of the glassy graphene field-effect transistor.
- fig. S4. Time gravity analysis of the glucose-PEI mixture compared to that of PEI and glucose.
- fig. S5. PEI-assisted film growth.

Supplementary Materials

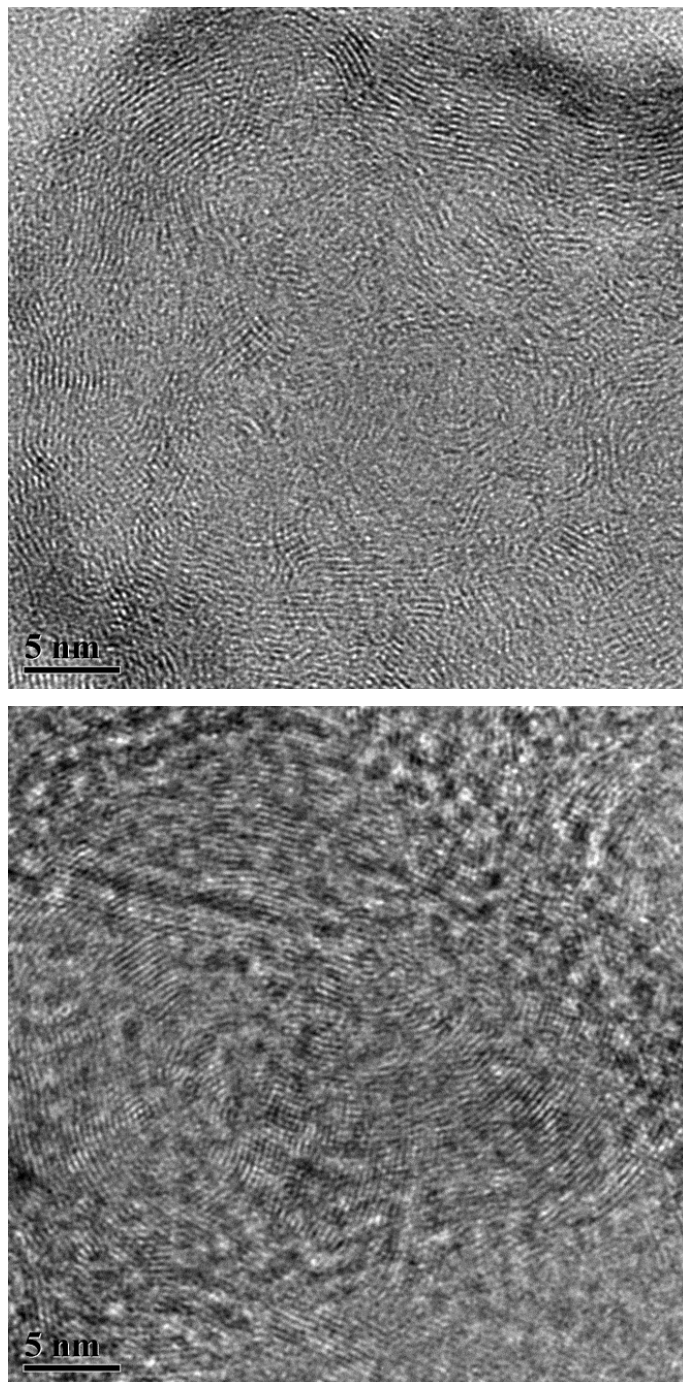

fig. S1. HRTEM images of glassy graphene.

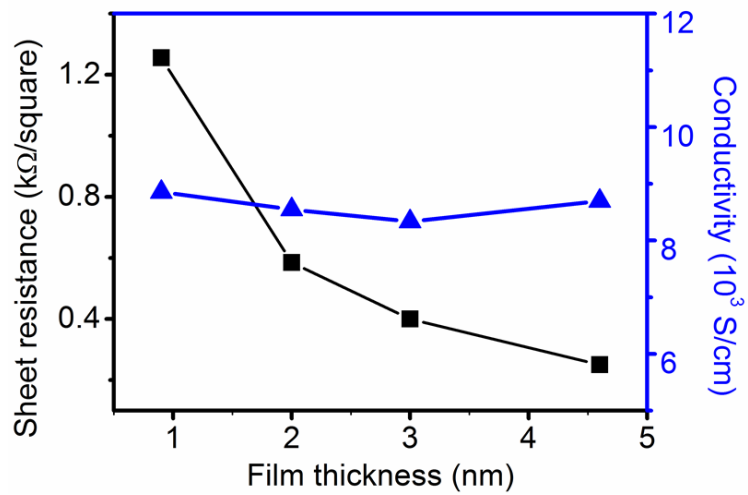

**fig. S2. Resistance and conductivity of glassy graphene thin films after transfer.**

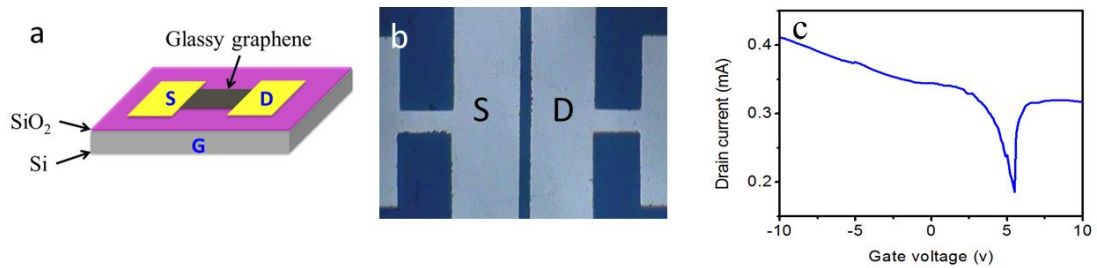

**fig. S3. Structure and property of the glassy graphene field-effect transistor. (a)** Structure of the field-effect transistor (FET). **(b)** Photo of the as produced FET. **(c)** Drain current as a function of the gate voltage for the FET.

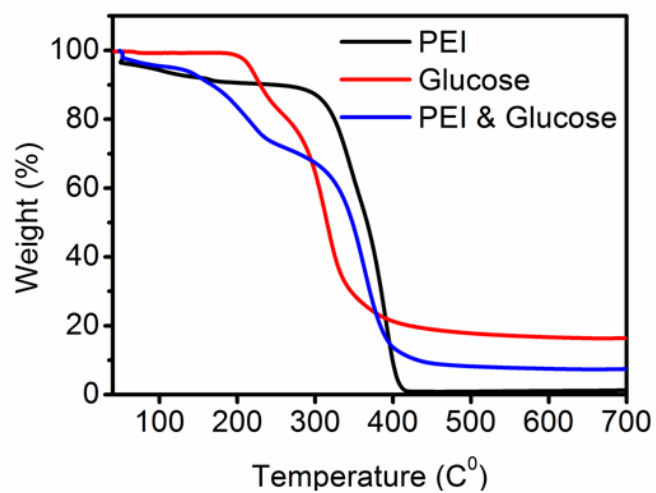

**fig. S4. Time gravity analysis of the glucose-PEI mixture compared to that of PEI and glucose.**

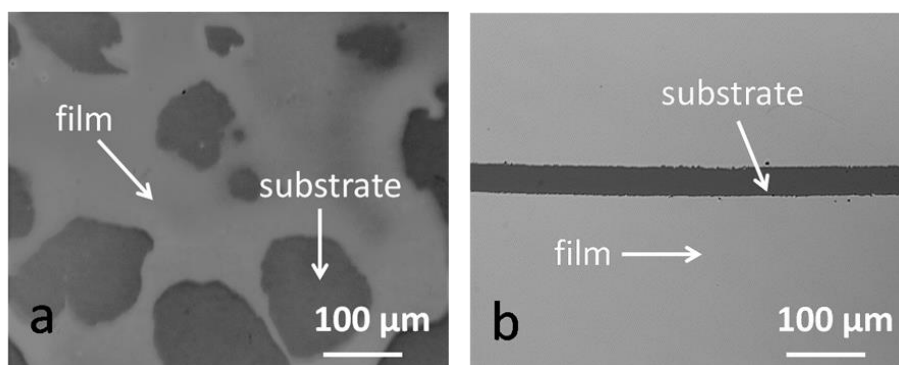

**fig. S5. PEI-assisted film growth. (a) Deposition of glassy carbon film without PEI assistant. (b) Deposition of glassy carbon film with PEI assistant.**
